# Supplementary material
Source: bioRxiv or medRxiv preprint supplement (https://www.biorxiv.org/highwire/filestream/125280/field_highwire_adjunct_files/1/413070-2.pdf)
Supplement: Supplementary file [file 413070-2.pdf]

A

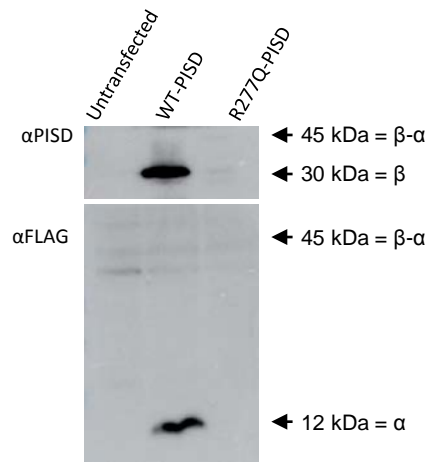

Supplemental Figure S2
